# Supplementary material for: Bioinspired superhydrophobic polylactic acid aerogel with a tree branch structure for the removal of viscous oil spills assisted by solar energy
Source: Royal Society of Chemistry journal article supplement (doi:10.1039/d4ta00349g), 2024-01-01
Supplement: d4ta00349g1.pdf [file d4ta00349g1.pdf]

***Supporting Information for:***

**Bioinspired superhydrophobic polylactic acid aerogel with tree branch  
structure for the removal of viscous oil spills assisted by solar energy**

Yihao Guan <sup>a, b, d</sup>, Bingqian Bi <sup>a, b</sup>, Di Qiao <sup>a, b</sup>, Sijing Cao <sup>a, b</sup>, Wenjun Zhang <sup>a, b</sup>,

Zhining Wang <sup>c</sup>, Hongbo Zeng <sup>d</sup>, Yiming Li <sup>a, b, \*</sup>

<sup>a</sup> *Frontiers Science Center for Deep Ocean Multispheres and Earth System/Key Laboratory of  
Marine Chemistry Theory and Technology, Ministry of Education, Ocean University of China,  
266100, Qingdao, P.R. China*

<sup>b</sup> *College of Chemistry & Chemical Engineering, Ocean University of China, Qingdao 266100,  
P.R. China*

<sup>c</sup> *Shandong Key Laboratory of Water Pollution Control and Resource Reuse, School of  
Environmental Science and Engineering, Shandong University, Qingdao 266237, P.R. China*

<sup>d</sup> *Department of Chemical and Materials Engineering, University of Alberta, Edmonton, Alberta  
T6G 1H9, Canada*

---

\* Corresponding author.  
E-mail address: [liyym@ouc.edu.cn](mailto:liyym@ouc.edu.cn) (Y.M. Li)

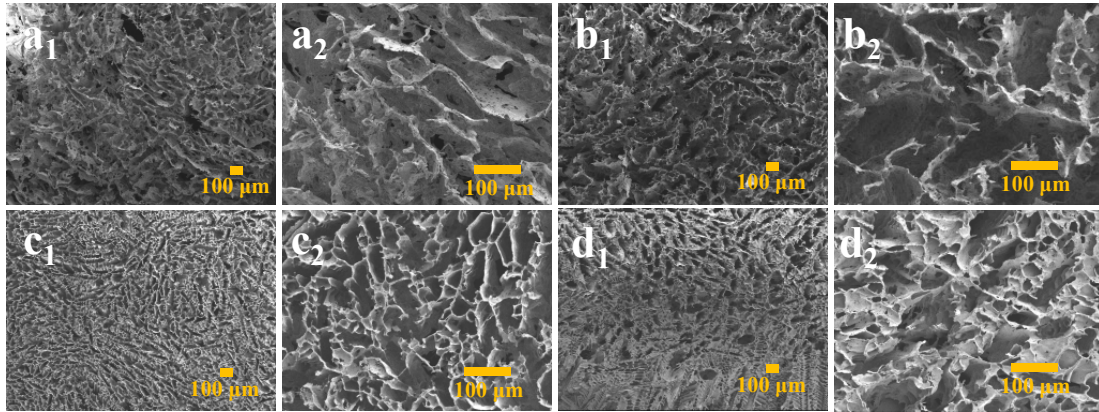

**Fig. S1** SEM images of PLA aerogel prepared from different PLA concentrations (a) 10 %, (b) 20 %, (c) 30 %, and (d) 40 %.

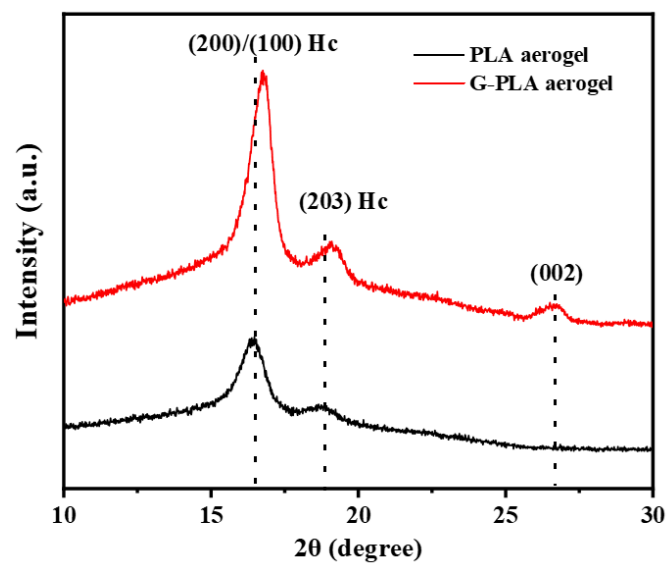

**Fig. S2** XRD spectrum of PLA and G-PLA aerogel.

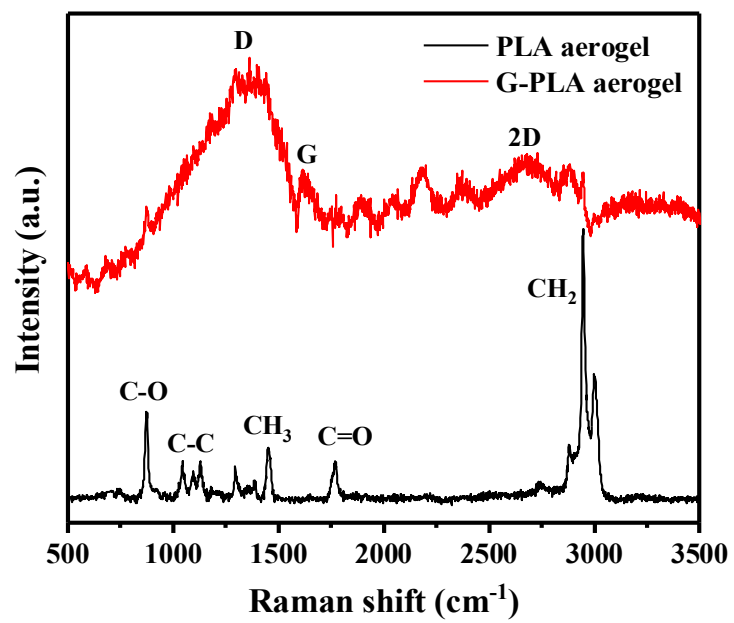

Fig. S3 Raman spectrum of PLA and G-PLA aerogel.

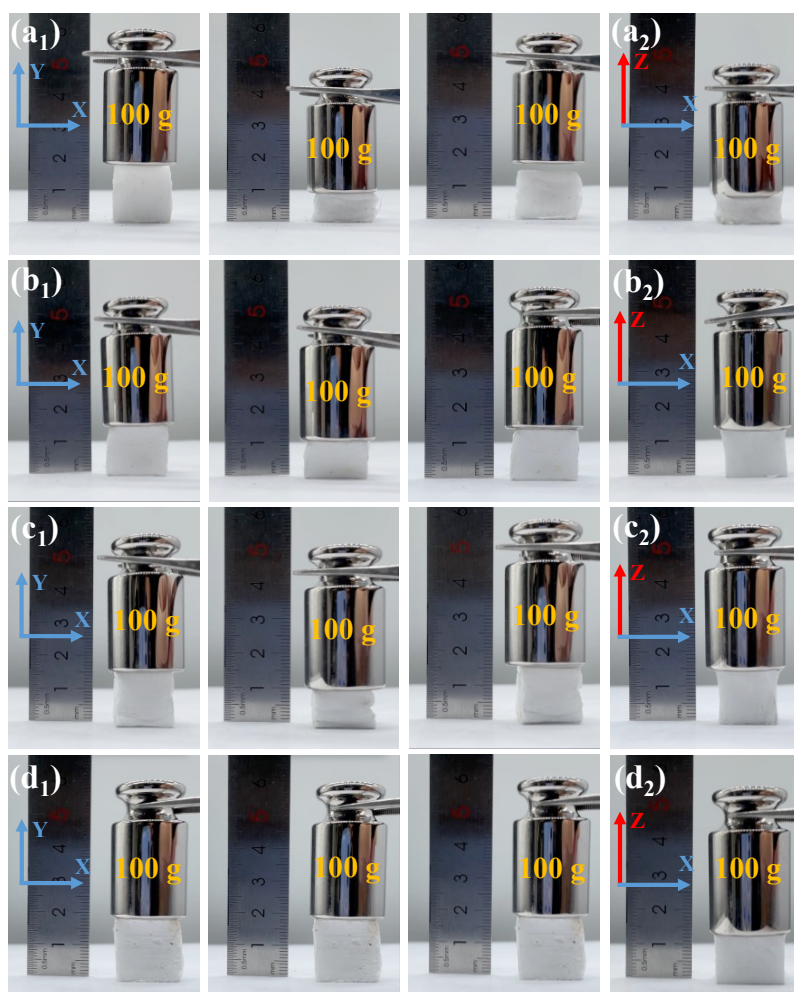

**Fig. S4** Shape recovery of the (a) 10 % PLA, (b) 20 % PLA, (c) 30 %PLA, and (d) 40 % PLA aerogel after being compressed by a weight of 100 g.

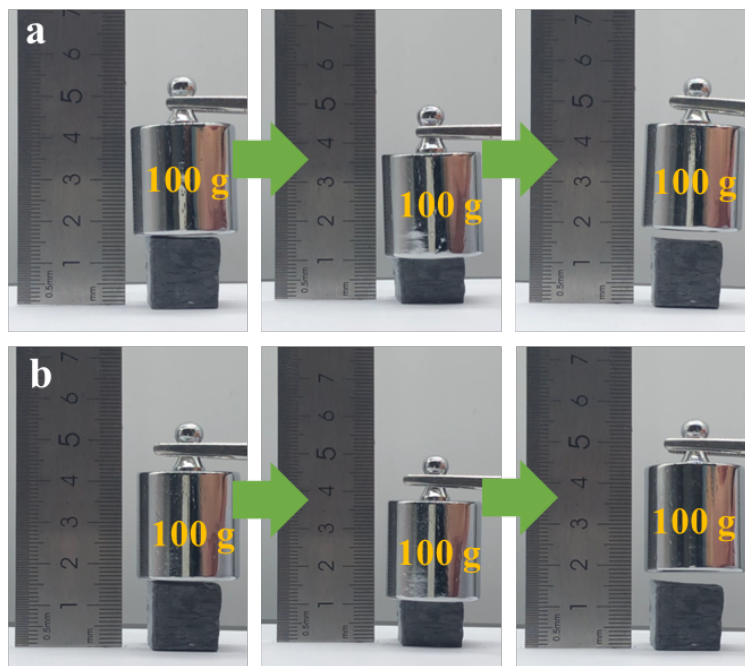

**Fig. S5** Shape recovery of the G-PLA aerogel after being compressed by a weight of 100 g, and the graphene content are (a) 2 % and (b) 6 %, respectively.

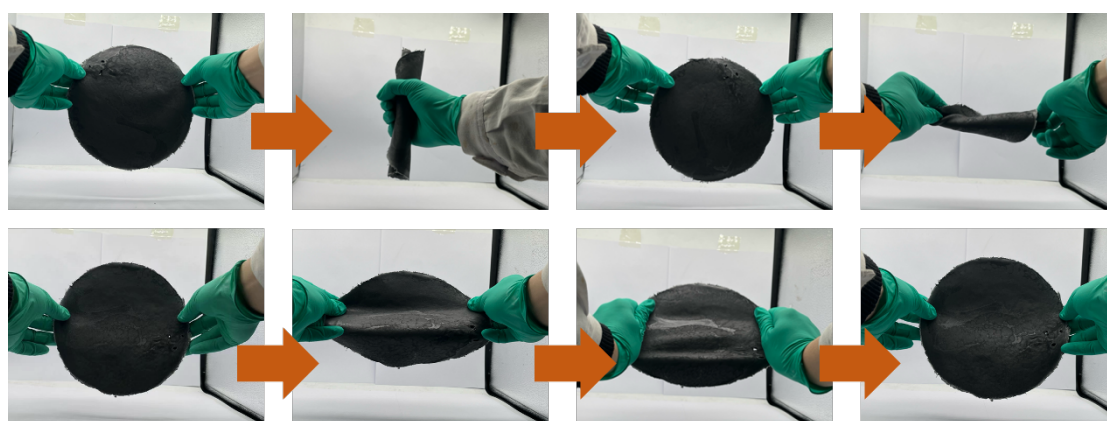

**Fig. S6** G-PLA aerogel bending, twisting, and stretching test.

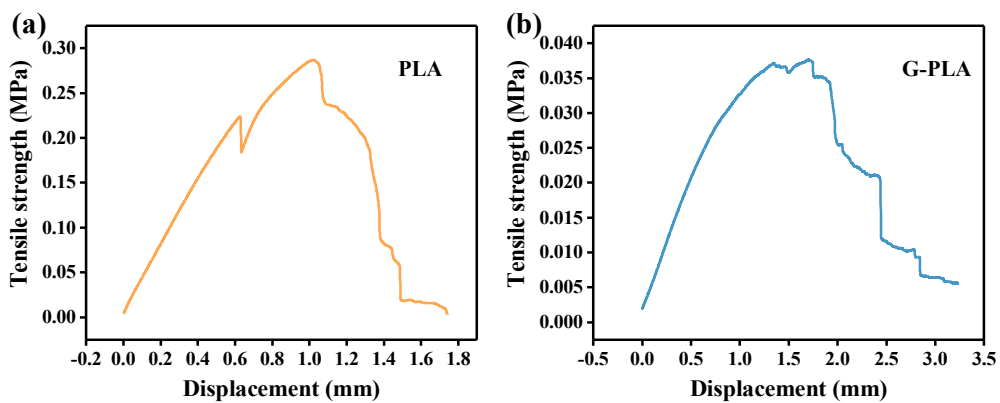

Fig. S7 Tensile properties of (a) PLA aerogel, and (b) G-PLA aerogel.

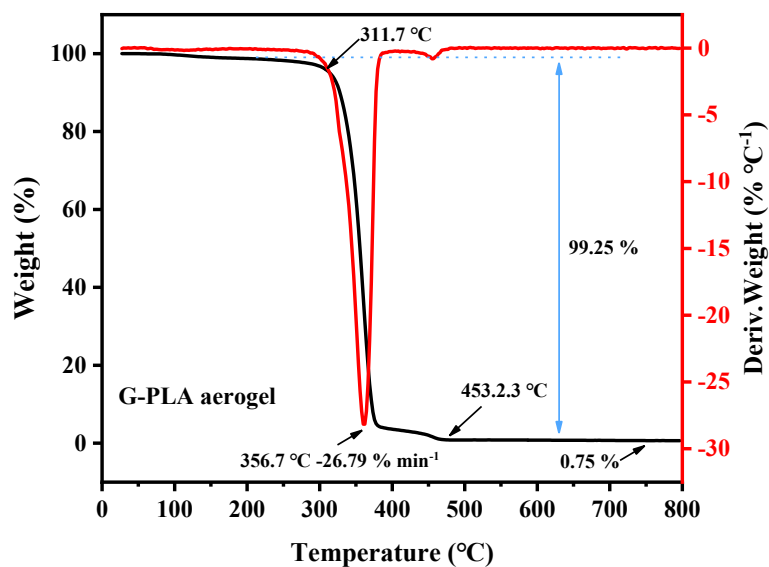

Fig. S8 TGA diagrams and DTG analysis of G-PLA aerogel.

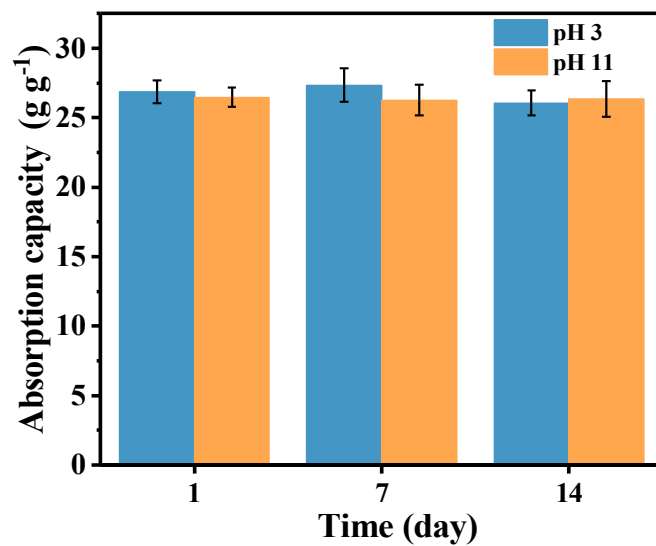

**Fig. S9** The crude oil absorption of G-PLA aerogel immersing in pH 3, and pH 11 solutions after 7 and 14 days.

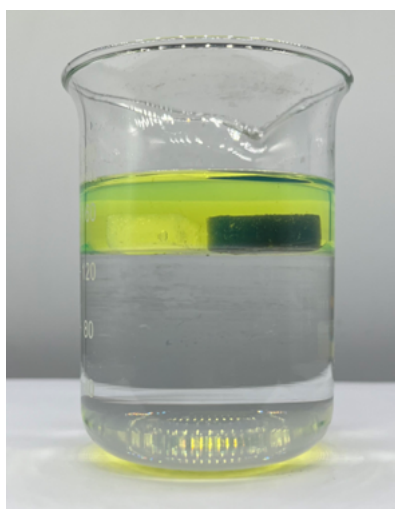

**Fig. S10** Photographs of PLA (left) and G-PLA (right) aerogel in diesel/water mixture.

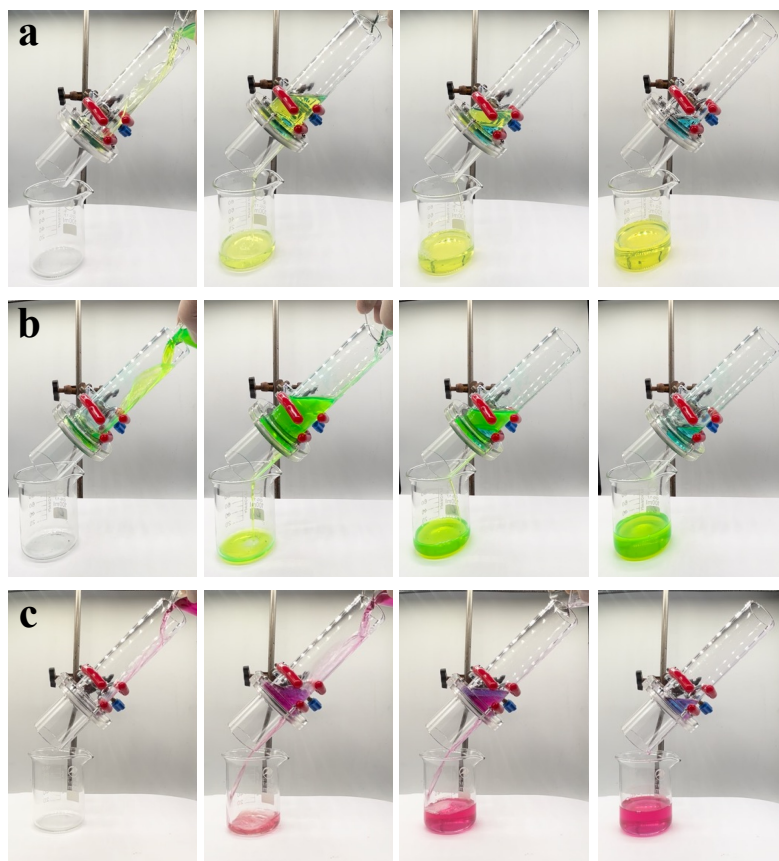

**Fig. S11** Photographs of G-PLA aerogel for a mixture of water and diesel (a), kerosene (b), and  $\text{CCl}_4$  (c), respectively.

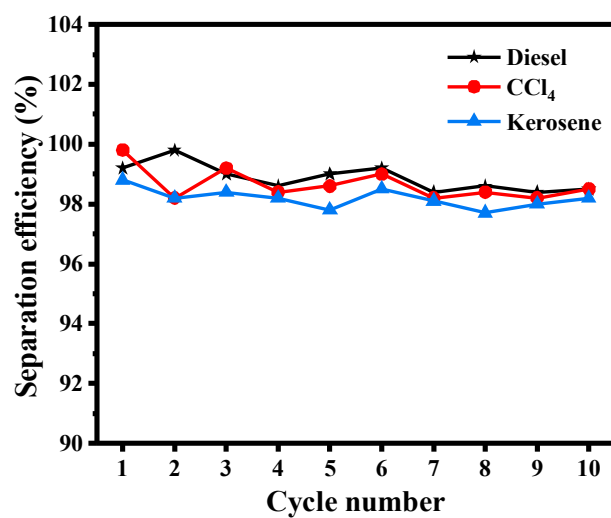

**Fig. S12** Cycles separation efficiency of G-PLA aerogel for a mixture of water and diesel, kerosene, and  $\text{CCl}_4$ , respectively.



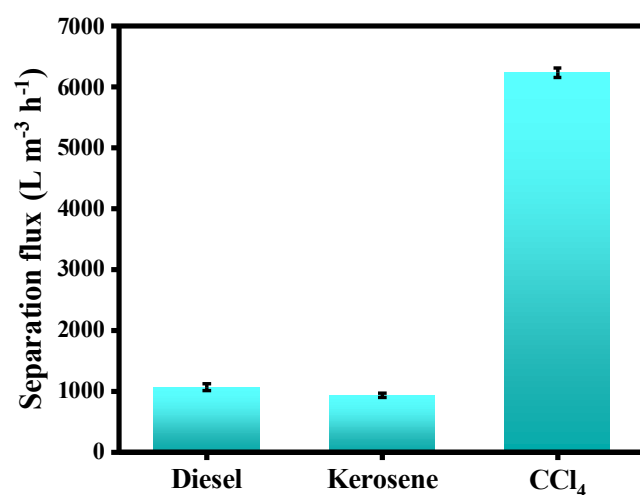

**Fig. S13** Separation flux of G-PLA aerogel for a mixture of water and diesel, kerosene, and CCl<sub>4</sub>, respectively.

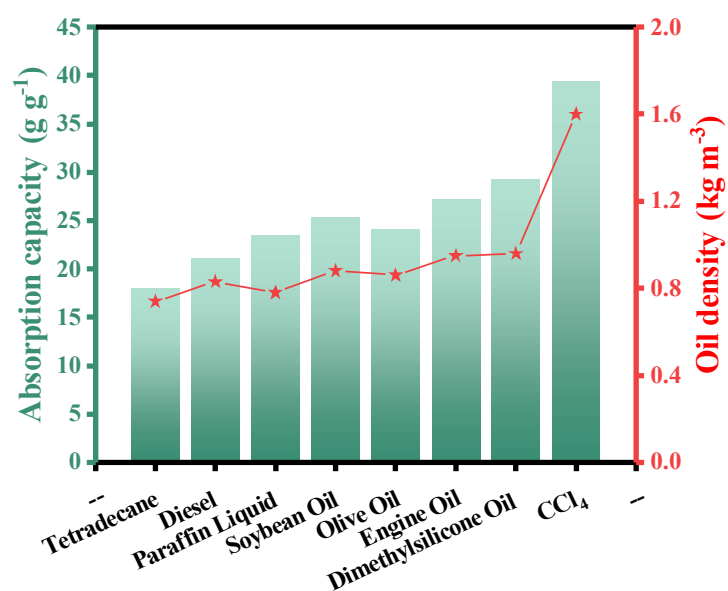

**Fig. S14** Absorption capacity of the G-PLA aerogel for various oils or organic solvents.

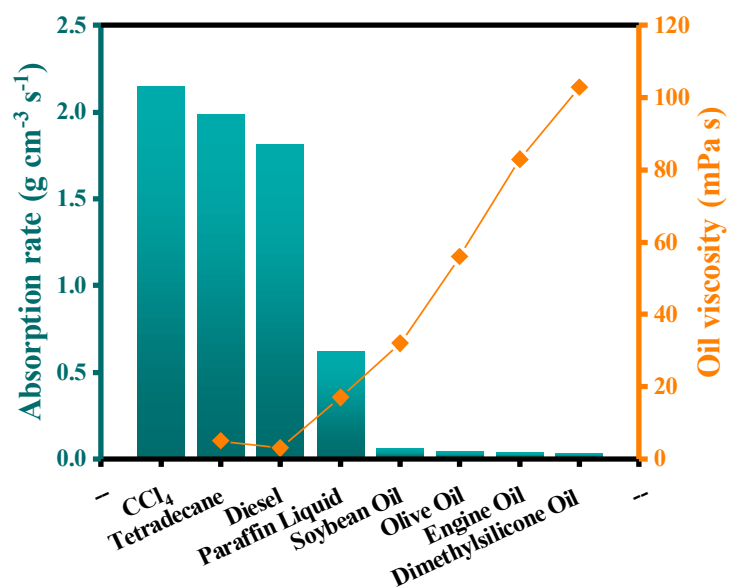

**Fig. S15** Absorption rate of the G-PLA aerogel for various oils or organic solvents with different viscosities.

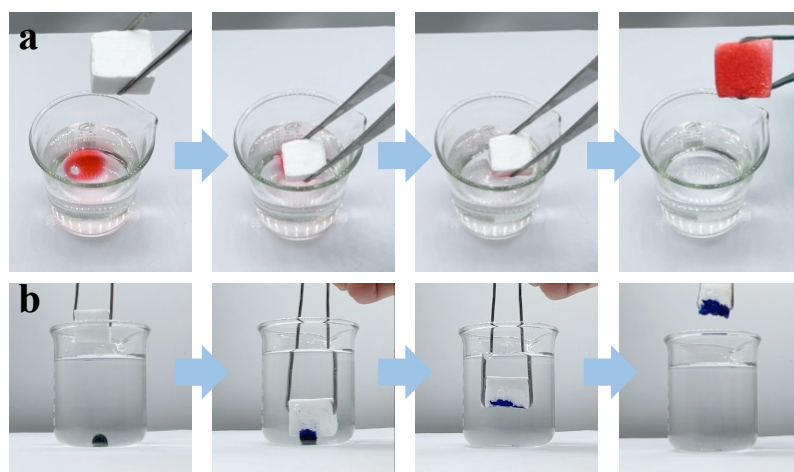

**Fig. S16** Photographs showing (a) removal of diesel from the water surface and (b) trichloromethane underwater by the G-PLA aerogel.

| PS \ CH                                                                                                     | 0                      | 5     | 10    | 15    | CH \ OV | $K_s$ |
|-------------------------------------------------------------------------------------------------------------|------------------------|-------|-------|-------|---------|-------|
| <b>a<sub>1</sub></b><br>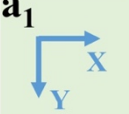   | 0 s<br>Tetradecane     | 8 s   | 48 s  | 129 s | 5       | -     |
| <b>a<sub>2</sub></b><br>   | 0 s<br>Tetradecane     | 3 s   | 15 s  | 33 s  | 5       | 0.48  |
| <b>a<sub>3</sub></b><br>   | 0 s<br>Tetradecane     | 15 s  | 58 s  | 92 s  | 5       | -     |
| <b>a<sub>4</sub></b><br>   | 0 s<br>Tetradecane     | 2 s   | 9 s   | 17 s  | 5       | 0.52  |
| <b>a<sub>5</sub></b><br>   | 0 s<br>Liquid paraffin | 40 s  | 106 s | 210 s | 17      | 0.33  |
| <b>a<sub>6</sub></b><br>  | 0 s<br>Soybean oil     | 47 s  | 127 s | 240 s | 32      | 0.29  |
| <b>a<sub>7</sub></b><br> | 0 s<br>Engine oil      | 106 s | 371 s | 728 s | 83      | 0.18  |

PS: Pore structure CH: Climbing height (mm) OV: Oil viscosity (mPa s)

**Fig. 17** Successive optical images showing distinct absorbing rate of oils with different viscosities inside the different porous structures: (a<sub>1</sub>) random pores and (a<sub>2</sub>) aligned channels of PLA aerogel, (a<sub>3</sub>) random pores and (a<sub>4</sub>- a<sub>7</sub>) aligned channels of G-PLA aerogel.

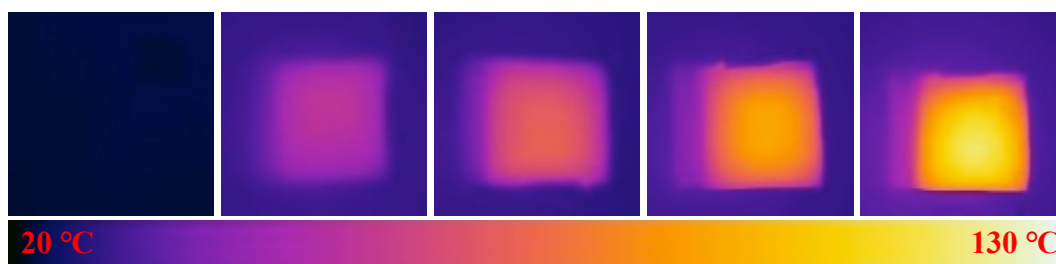

**Fig. S18** IR images of G-PLA aerogel under simulated sunlight irradiation ( $\text{kW m}^{-2}$ ) of 0, 0.5, 1.0, 1.5, and 2.0 from left to right.

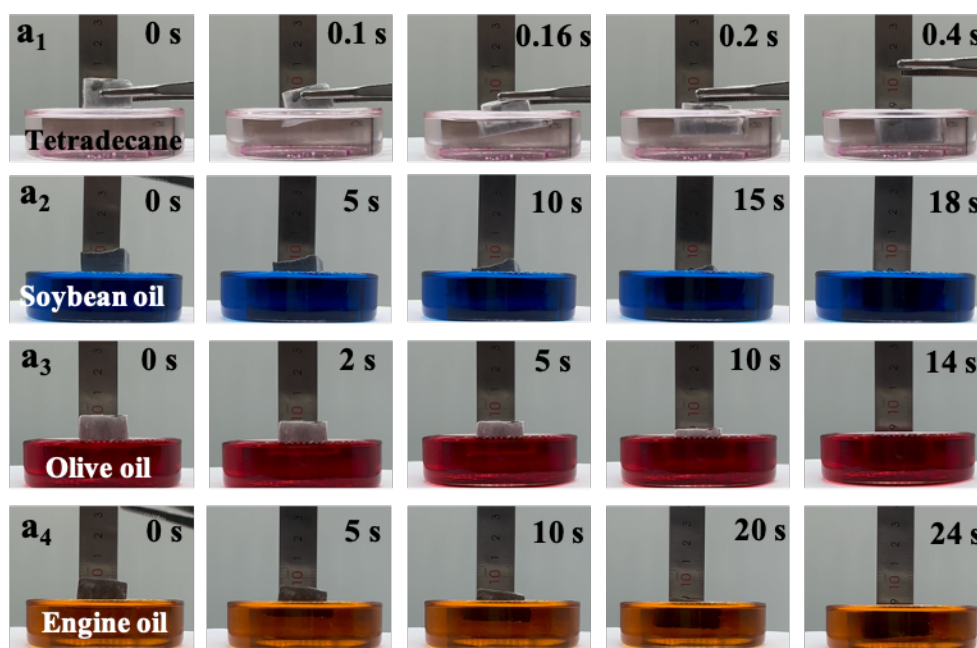

**Fig. S19** Photographs showing the sinking behavior of G-PLA aerogel in different types of oils under no sunlight.

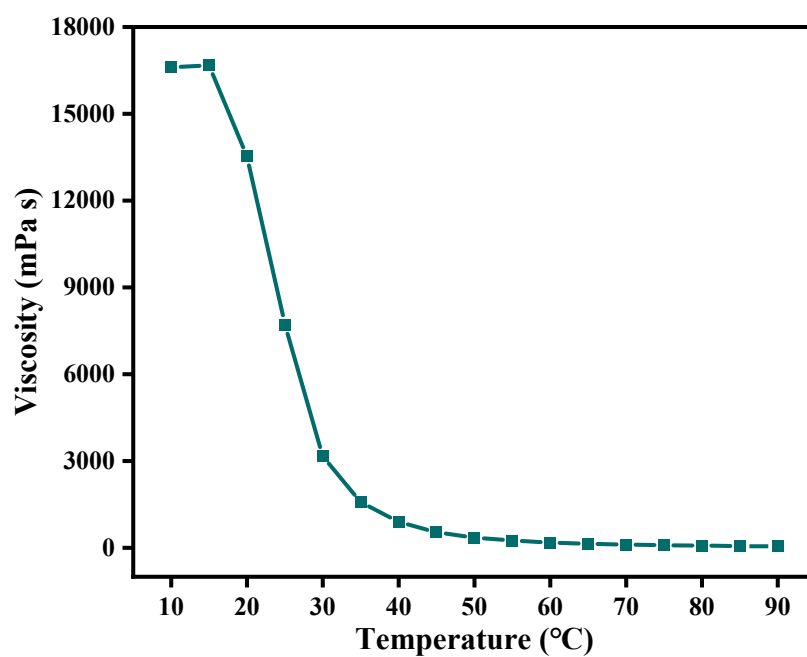

**Fig. S20** The variance of crude oil viscosity with temperature.

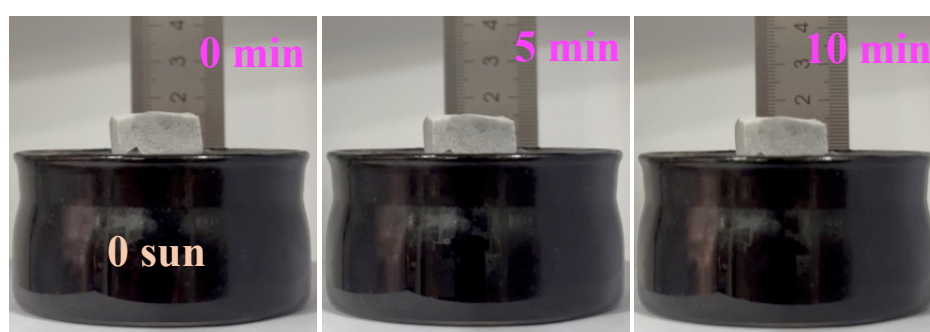

**Fig. S21** Photographs showing the sinking behavior of G-PLA aerogel in the absence of sunlight irradiation.

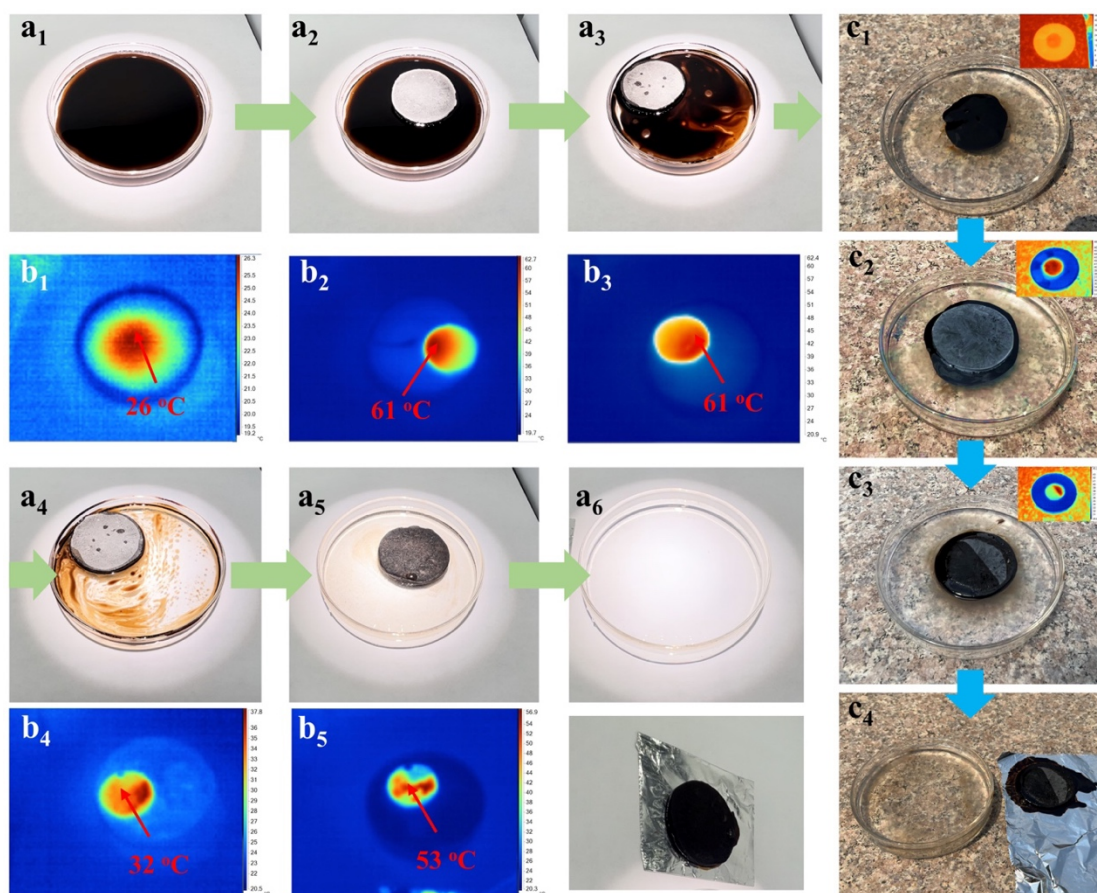

**Fig. S22** The optical photos and corresponding infrared thermal imaging of G-PLA aerogel in absorbing crude oil on the sea surface at (a, b) laboratory ( $1 \text{ kW m}^{-2}$  light intensity), and (c) outdoors (13:00).



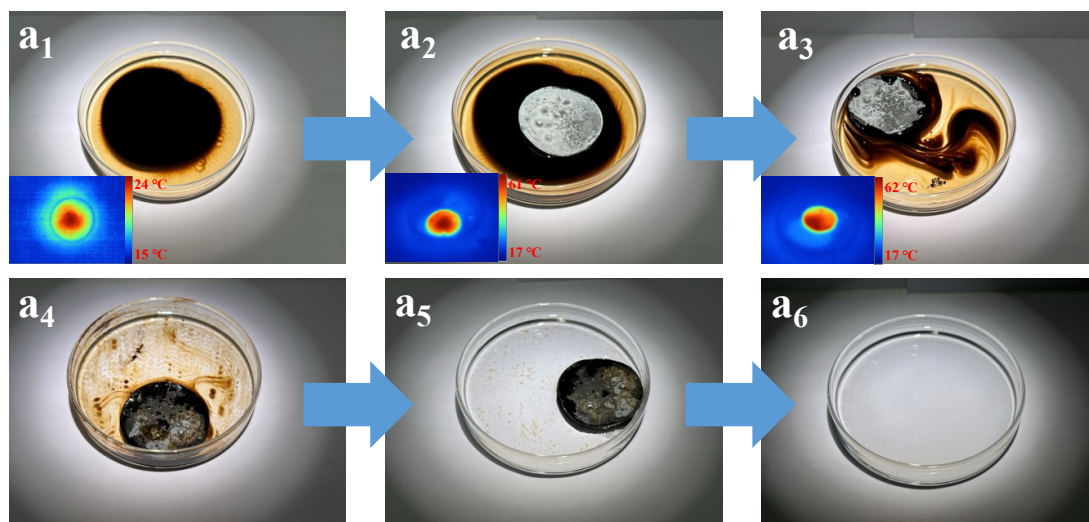

**Fig. S23** The optical photos and corresponding infrared thermal imaging of G-PLA aerogel in absorbing crude oil on the sea surface, and the seawater collected in Qingdao Shilaoren Beach.

**Table S1:** Parameters of different types of oils

|                 | Density ( $\text{kg m}^{-3}$ ) | Viscosity ( $\text{mPa s}$ ) | Surface tension ( $\text{mN m}^{-1}$ ) |
|-----------------|--------------------------------|------------------------------|----------------------------------------|
| Tetradecane     | 0.76                           | 5                            | 26.5                                   |
| Liquid paraffin | 0.88                           | 17                           | 25.6                                   |
| Soybean oil     | 0.92                           | 32                           | 35.2                                   |
| Engine oil      | 0.95                           | 83                           | 34.6                                   |
